# Supplementary material for: Geometrically-controlled evaporation-driven deposition of conductive carbon nanotube patterns on inclined surfaces
Source: Royal Society of Chemistry journal article supplement (doi:10.1039/d2sm01431a), 2023-01-01
Supplement: d2sm01431a1.pdf [file d2sm01431a1.pdf]

Supplementary Information for:

# **Geometrically-controlled evaporation-driven deposition of conductive carbon nanotube patterns on inclined surfaces**

**Shervin Issakhani<sup>1</sup>, Omid Jadidi<sup>1</sup>, Jafar Farhadi<sup>1</sup>, Vahid Bazargan<sup>1,\*</sup>**

<sup>1</sup>School of Mechanical Engineering, College of Engineering, University of Tehran, Tehran, Iran

\*[vbazargan@ut.ac.ir](mailto:vbazargan@ut.ac.ir)

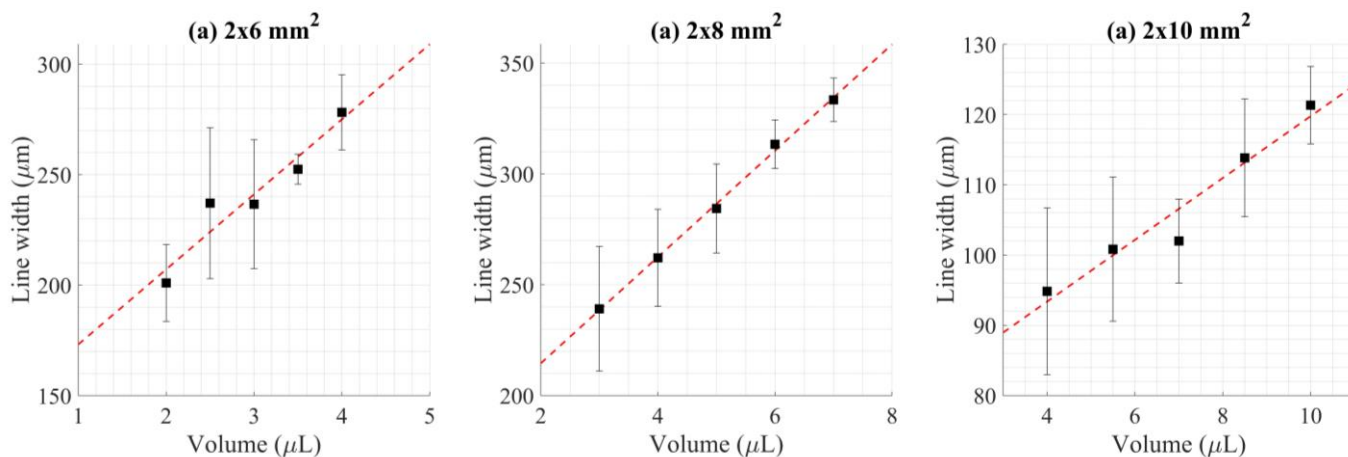

Fig. S1: The width of the deposited lines as a function of volume on pedestals with (a)  $2 \times 6 \text{ mm}^2$ , (b)  $2 \times 8 \text{ mm}^2$ , and (c)  $2 \times 10 \text{ mm}^2$  dimensions.

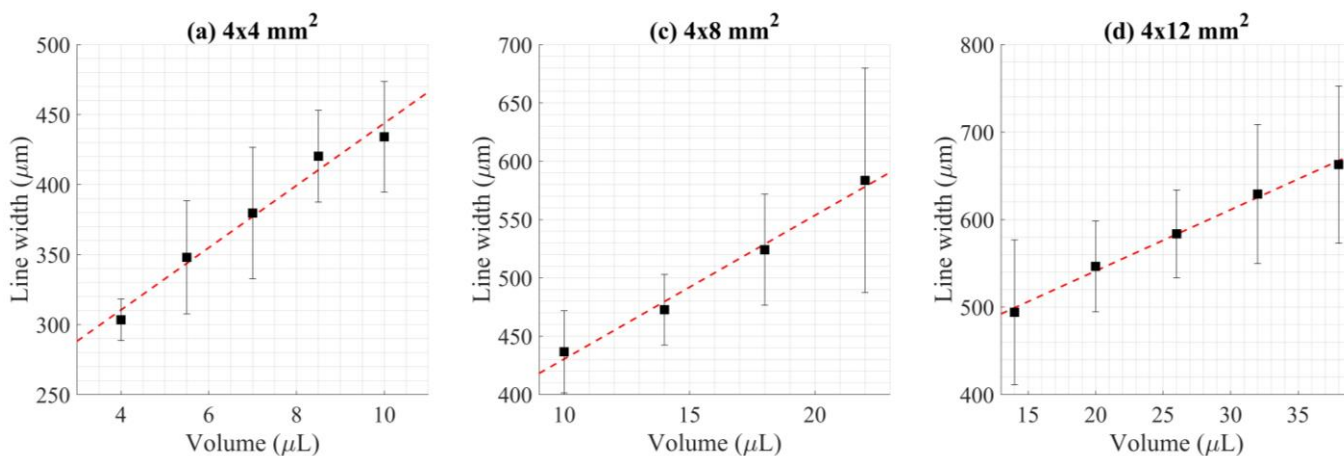

Fig. S2: The width of the deposited lines as a function of volume on pedestals with (a)  $4 \times 4 \text{ mm}^2$ , (b)  $4 \times 8 \text{ mm}^2$ , and (c)  $4 \times 12 \text{ mm}^2$  dimensions.

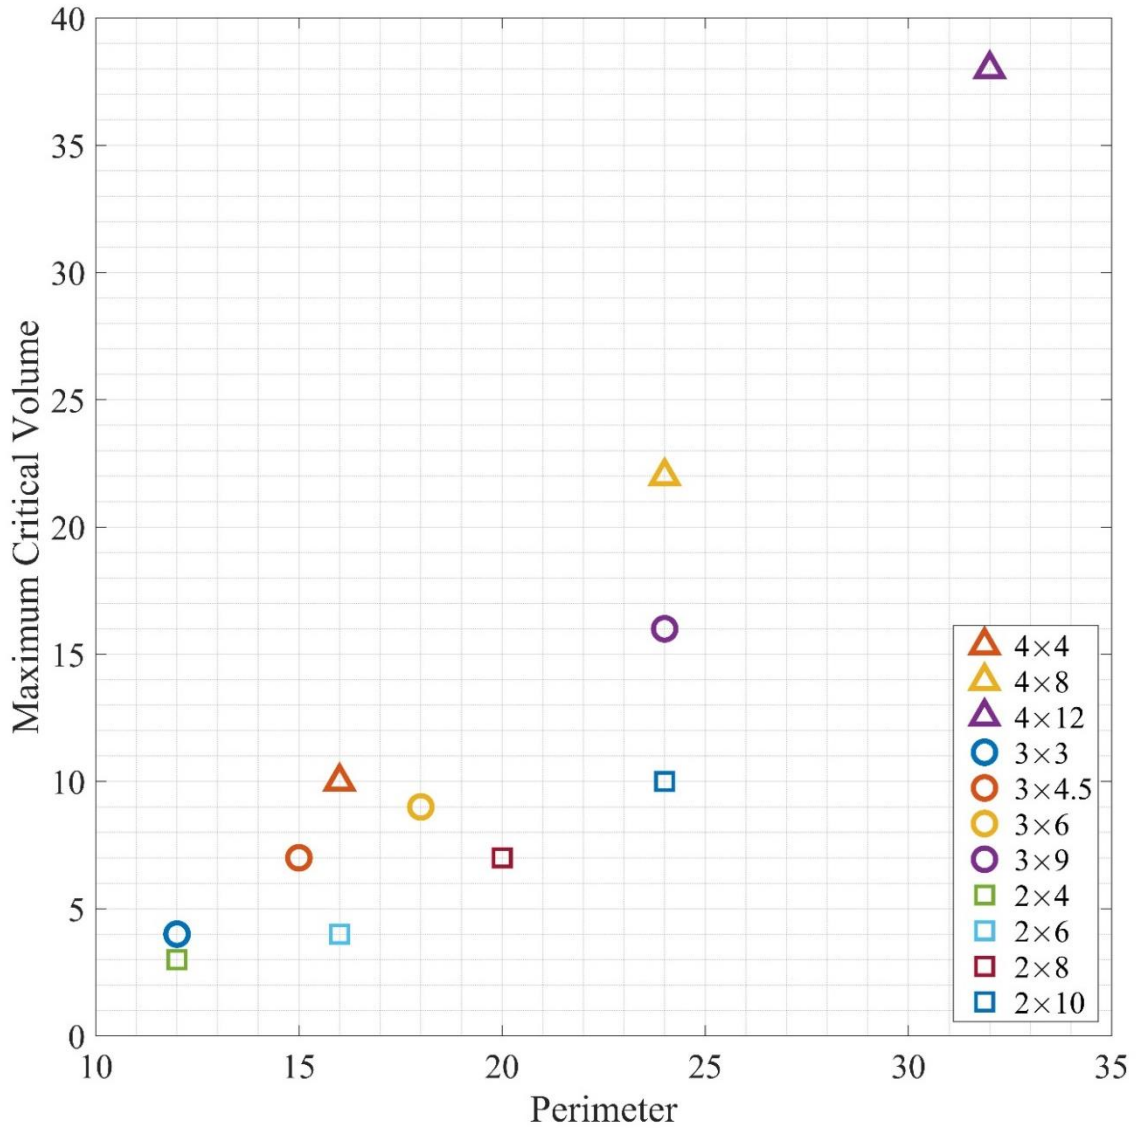

Fig. S3: Maximum critical volume as a function of the perimeter of each pedestal. It is shown that a surface with longer solid sharp edges (longer perimeter) can impose more pinning force on the droplet contact line, hence being able to retain higher volumes within its surface.

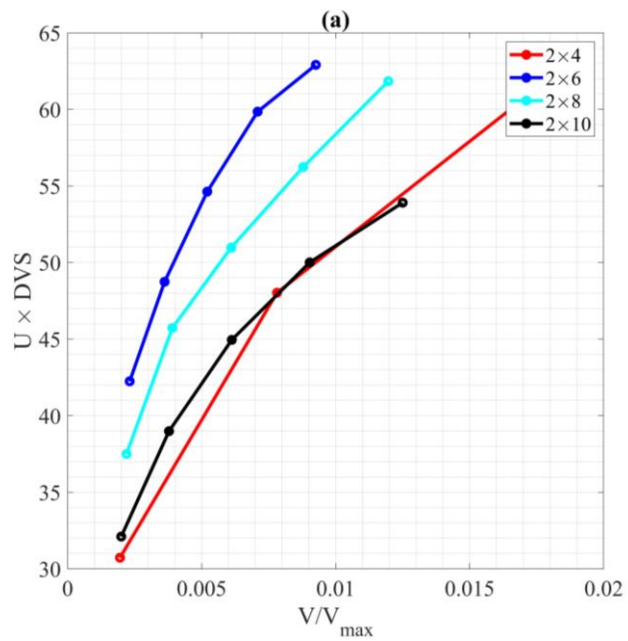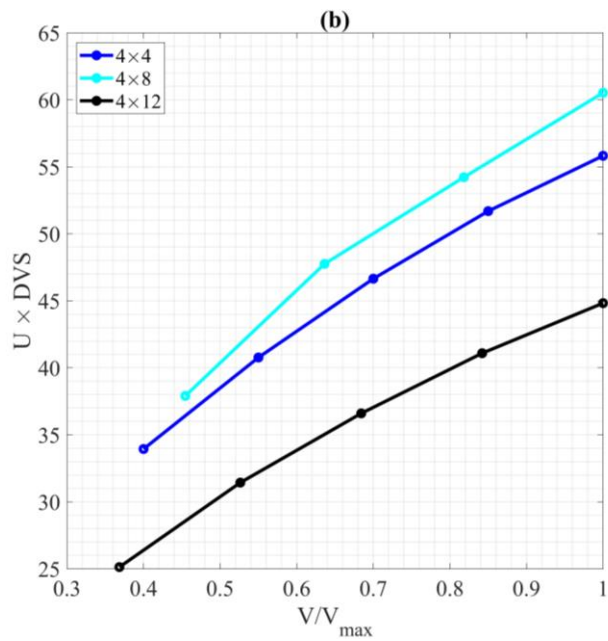

Fig. S4: Efficiency of each pedestal represented by uniformity number ( $U$ ) multiplied by dimensionless volume sensitivity (DVS) for (a) 2 mm wide and (b) 4 mm wide pedestals.
